# Supplementary material
Source: MDPI journal article supplement (https://www.mdpi.com/2311-7524/8/10/968)

## File S4:

### Melting curve analysis of *CHS* and *actin* gene primers in three mango cultivars

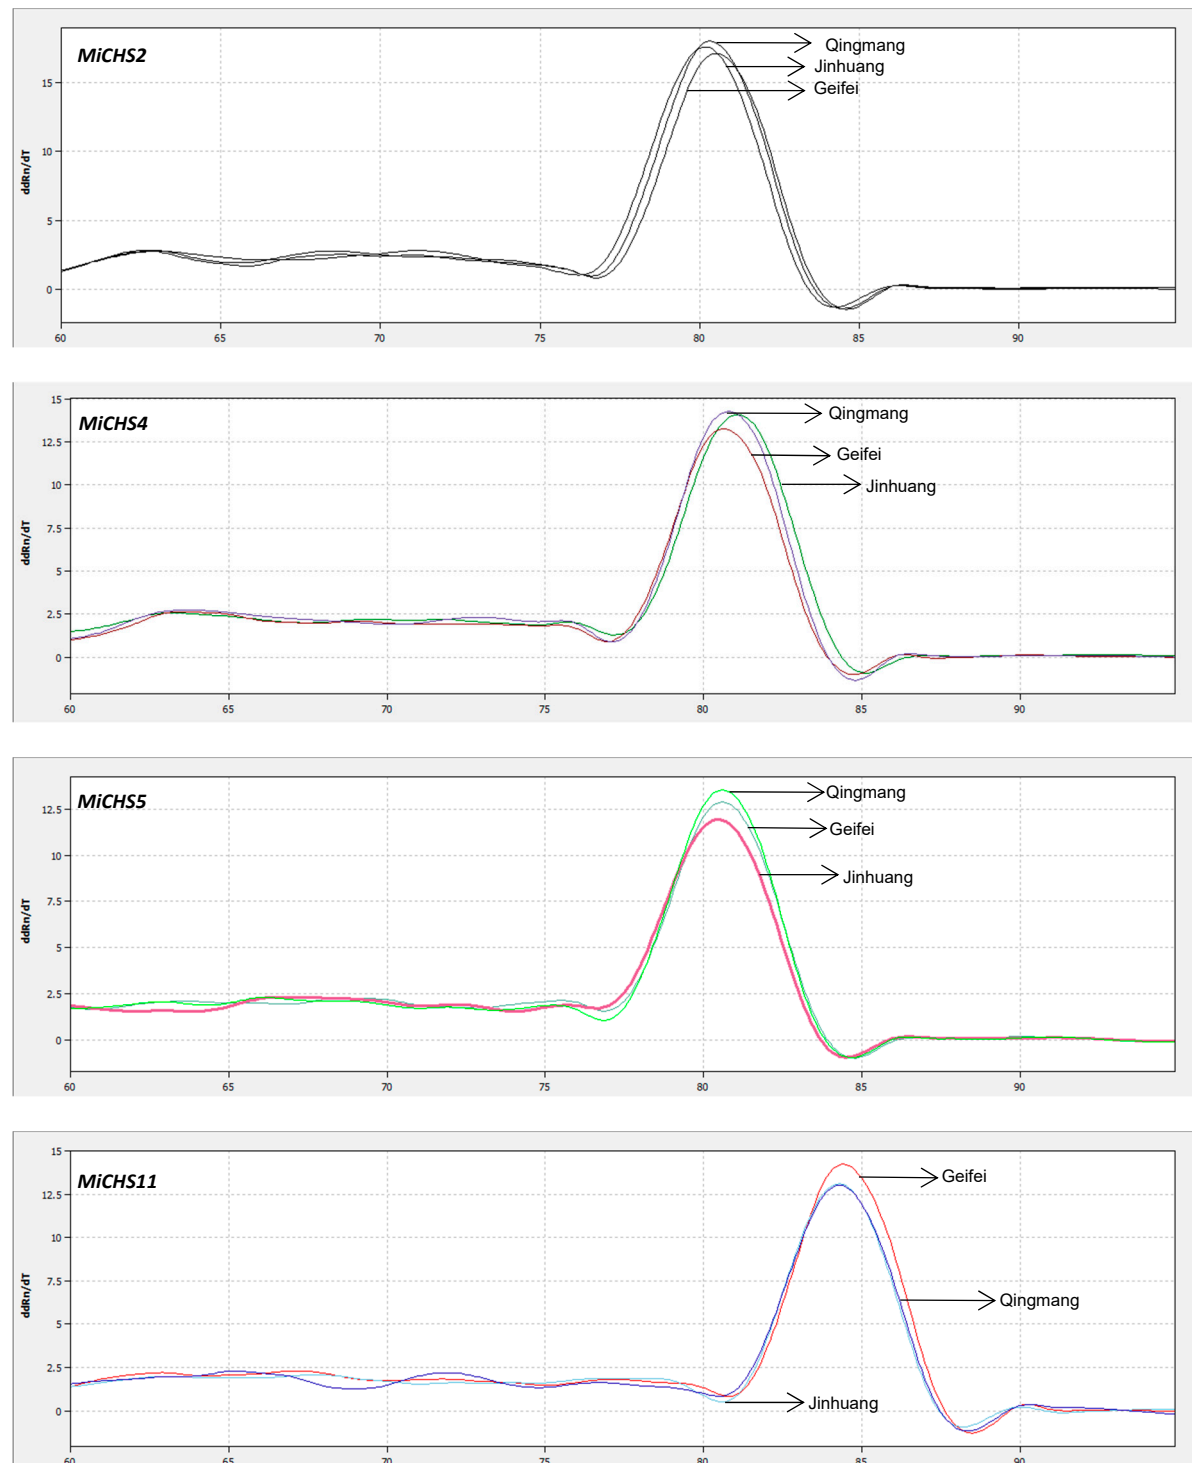

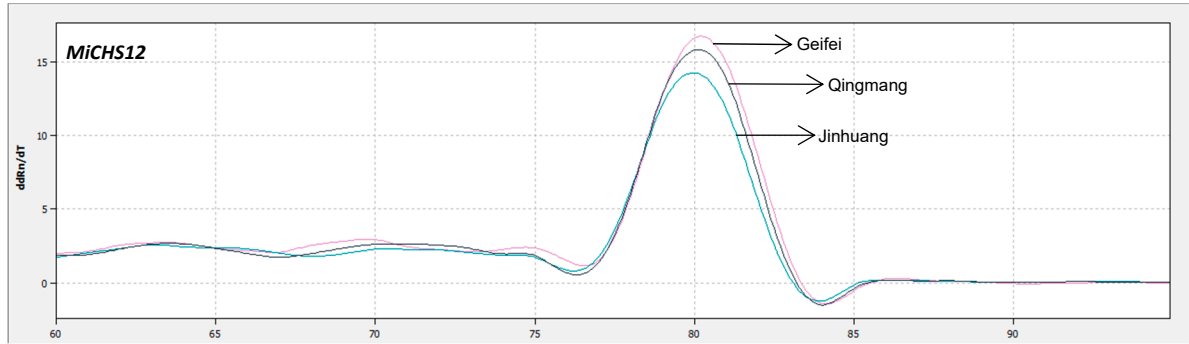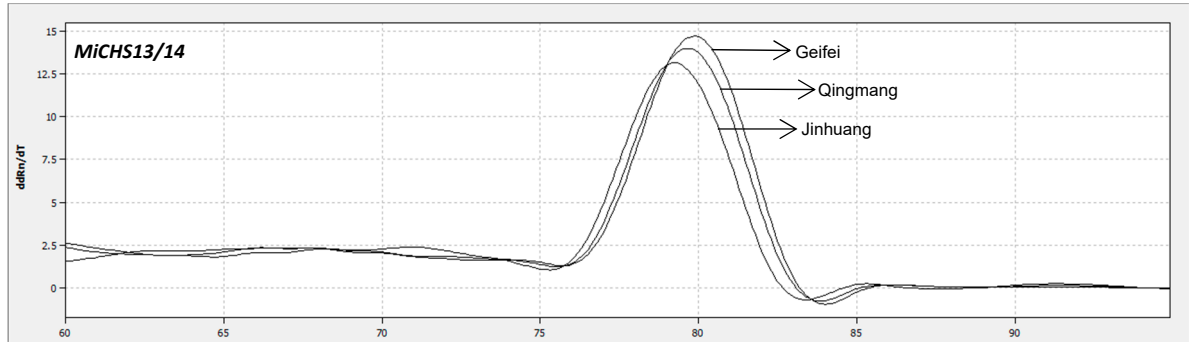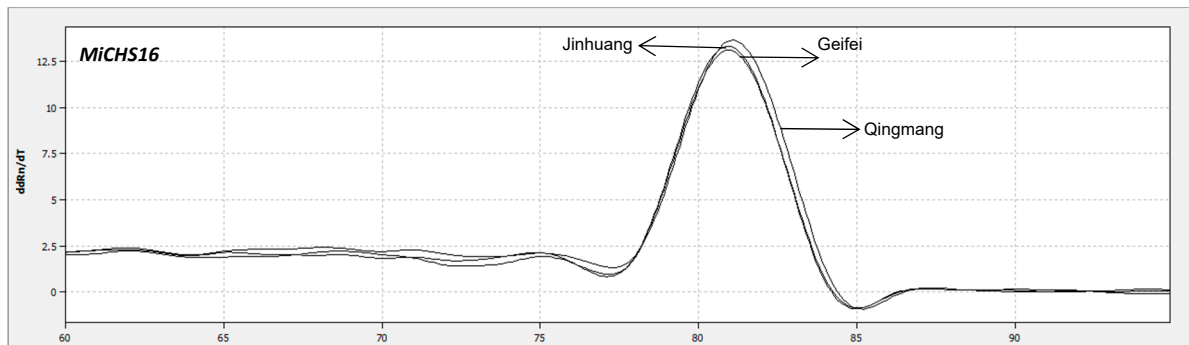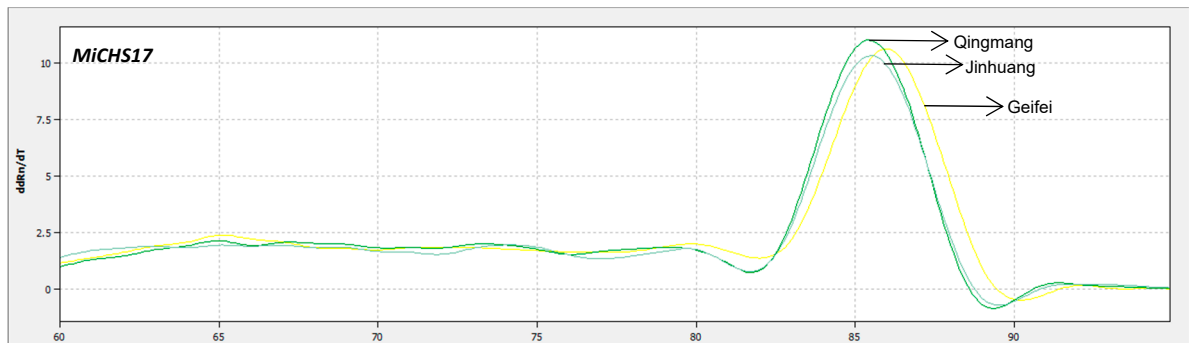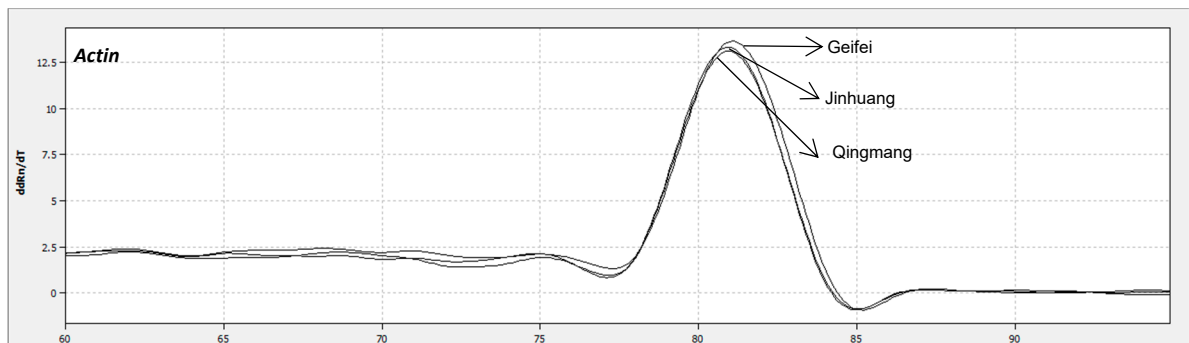

Supplement: s1 [file s1]
